1 Two years of longitudinal measurements of human adenovirus group F, norovirus GI and GII,  
2 rotavirus, enterovirus, enterovirus D68, hepatitis A virus, *Candida auris*, and West Nile virus  
3 nucleic-acids in wastewater solids: A retrospective study at two wastewater treatment plants  
4  
5  
6

7 Alexandria B. Boehm<sup>1\*</sup>, Marlene K. Wolfe<sup>2</sup>, Bradley J. White<sup>3</sup>, Bridgette Hughes<sup>3</sup>, Dorothea  
8 Duong<sup>3</sup>

- 9 1. Department of Civil & Environmental Engineering, School of Engineering and Doerr  
10 School of Sustainability, Stanford University, 473 Via Ortega, Stanford, CA, USA 94305  
11 2. Gangarosa Department of Environmental Health, Rollins School of Public Health, Emory  
12 University, 1518 Clifton Rd, Atlanta, GA, USA, 30322  
13 3. Verily Life Sciences LLC, South San Francisco, CA, USA, 94080  
14  
15  
16  
17

18 \* Author to whom correspondence should be addressed. Email: [aboehm@stanford.edu](mailto:aboehm@stanford.edu), Tel:  
19 650-724-9128  
20  
21  
22

## 23 Abstract

24  
25 Wastewater monitoring for infectious disease targets is increasingly used to better understand  
26 circulation of diseases. The present study validated hydrolysis-probe digital droplet (reverse-  
27 transcriptase (RT))-PCR assays for important enteric viruses (rotavirus, adenovirus group F,  
28 norovirus GI and GII, and enteroviruses), outbreak or emerging viruses (hepatitis A and West  
29 Nile virus), and an emerging drug resistant fungal pathogen (*Candida auris*). We used the  
30 assays to retrospectively measure concentrations of the targets in wastewater solids. Viral and  
31 fungal nucleic-acid concentrations were measured in two wastewater solids samples per week  
32 at two wastewater treatment plants in the San Francisco Bay Area of California, USA for 26  
33 months. We detected all targets in wastewater solids with the exception of West Nile virus. At  
34 both wastewater treatment plants, human adenovirus group F was detected at the highest  
35 concentrations, followed by norovirus GII, enteroviruses, norovirus GI, and rotavirus at the  
36 lowest concentrations. Hepatitis A and *C. auris* were detected less consistently than the  
37 aforementioned viruses. Enterovirus D68 was detected in a limited time frame during fall 2022  
38 at both sites. The measurements reported herein, and in some cases their seasonal trends, are  
39 consistent with previous reports of these targets in wastewater. These measurements represent  
40 some of the first quantitative measurements of these infectious disease targets in the solid  
41 fraction of wastewater. This study lays a foundation for the use of wastewater solids for the  
42 detection of specific infectious disease targets in wastewater monitoring programs aimed to  
43 better understand the spread of these diseases.

## 44 45 46 Introduction

47  
48 Infectious diseases are a leading cause of human morbidity and mortality globally<sup>1</sup>, and climate  
49 change is projected to exacerbate the spread of critical and emerging diseases<sup>2,3</sup>. Tracking  
50 infectious disease in individuals and populations is essential to inform prevention and response,  
51 including vaccine development, vaccination campaigns, pharmaceutical and non-  
52 pharmaceutical interventions, and also to better understand disease epidemiology.

53  
54 Infectious disease surveillance typically relies on clinical data. However, this data can be biased  
55 towards results from individuals with severe illness, comorbidities, and access to healthcare and  
56 diagnostic testing. In addition, clinical cases may not be reported to a centralized agency for  
57 collation, and if they are, it may take weeks for data to be organized and delivered to a public  
58 health agency for consumption. The biases and delays related to clinical data can therefore lead  
59 to missed opportunities to protect public health, particularly at critical times at the emergence of  
60 a disease, or the beginning and peak of an outbreak.

61  
62 Wastewater monitoring for infectious disease surveillance can be used to assess the  
63 occurrence of diseases in populations. Wastewater contains excretions from individuals that  
64 enter drains and toilets in households and businesses including feces, urine, sputum, mucus  
65 and saliva. When individuals are infected by a pathogen, then that pathogen or its components  
66 (nucleic-acids and proteins) are excreted and often enter the wastewater. When wastewater is

67 collected at a wastewater treatment plant (WWTP), it represents a composite sample of all the  
68 people in the sewershed that the WWTP serves (anywhere from  $\sim 10^4$  -  $10^6$  individuals),  
69 including contributions of all infected individuals in the community. Unlike clinical data, this  
70 includes those who are asymptomatic or mildly symptomatic and those who do not seek or  
71 receive medical care. Results regarding the presence and concentration of different infectious  
72 disease targets (usually genomic nucleic-acids from viruses, bacteria or eukaryotes) can be  
73 available within 24 hours of sample collection for the community as a whole, limiting reporting  
74 and collating delays. Therefore, data from wastewater monitoring can be complementary to  
75 clinical data and may even provide early warnings of disease spread. Work to date suggests  
76 that wastewater monitoring can be used to detect occurrence of respiratory diseases including  
77 COVID-19<sup>4</sup>, influenza A<sup>5</sup> and B<sup>5,6</sup>, respiratory syncytial virus (RSV)<sup>7</sup>, and seasonal  
78 coronaviruses<sup>6</sup>, enteric diseases including human norovirus<sup>8</sup> and salmonellosis<sup>9</sup>, and other  
79 diseases such as mpox<sup>10</sup>, hepatitis A<sup>11</sup>, and *Candida auris*<sup>12</sup> infections.

80  
81 Raw wastewater is a complex mixture of liquids (water, urine, and other liquids put down  
82 drains), and solids or particles (feces, food, cells, and other material). Previous work has shown  
83 that viruses tend to partition to the solids in wastewater where their concentrations can be  
84 orders of magnitude higher than in the liquid<sup>10,13-16</sup>. Particles are typically defined using an  
85 operational definition (for example, larger than 0.45  $\mu\text{m}$  in diameter), and using this definition,  
86 bacteria and eukaryotic organisms in wastewater are part of the solid fraction. The solid fraction  
87 can be obtained by centrifuging raw wastewater to collect a pellet, or by sampling sludge from  
88 the primary clarifier. Many wastewater monitoring programs for infectious disease targets make  
89 measurements in the liquid phase of wastewater, but a handful<sup>17-19</sup>, including our program, use  
90 solids where these targets are already enriched.

91  
92 The goal of this study is to expand our understanding of the types of infections that may be  
93 surveilled through the use of wastewater monitoring. Herein, we conduct a retrospective study  
94 to investigate the occurrence of pathogen nucleic acids in wastewater samples over twenty-six  
95 months. Our work focuses on analyzing nucleic-acids associated with the particle/solid fraction  
96 of wastewater to take advantage of the “natural” ability of solids to concentrate the infectious  
97 disease targets of interest. In particular, we measured concentrations of human adenovirus  
98 group F, rotavirus, human norovirus GII, human norovirus GI, West Nile virus, hepatitis A virus,  
99 enteroviruses, enterovirus D 68, and *Candida auris* nucleic-acids in wastewater from two  
100 samples each week at two large wastewater treatment plants in the San Francisco Bay Area of  
101 California, USA.

## 102 103 **Methods**

104  
105 **RT-PCR assays.** We designed novel (RT-)PCR primers and internal hydrolysis probes for  
106 adenovirus group F (hereafter, HAdV) and enterovirus D-68 variants circulating in the Northern  
107 hemisphere 2022 winter (EVD68-2022). In addition, we designed a novel probe for *Candida*  
108 *auris* to use in conjunction with previously published specific and sensitive primers<sup>20</sup>. To design  
109 these primers and probes, *C. auris*, HAdV, and EVD68-2022 genome sequences were  
110 downloaded from NCBI in February 2023, April 2022, and September 2022, respectively, and

111 aligned to identify conserved regions. Primers and probes were developed *in silico* using  
112 Primer3Plus (<https://primer3plus.com/>). Parameters used in assay development (e.g. sequence  
113 length, GC content, and melt temperatures) are provided in Table S1. Primers and probes were  
114 then screened for specificity *in silico*, and *in vitro* against virus or fungal panels, intact viruses,  
115 synthetic viral genomic RNA, or cDNA sequences (Table 1).

116  
117 In addition to the novel assays, we used previously published assays for enterovirus D 68  
118 (EVD68)<sup>21</sup>, rotavirus<sup>22</sup>, hepatitis A virus (HAV)<sup>23</sup>, human norovirus (HuNoV) GI<sup>24</sup> and HuNoV  
119 GII<sup>25</sup>, enteroviruses (EV)<sup>26</sup>, and West Nile Virus (WNV)<sup>27</sup>. Each sample was also assayed for the  
120 SARS-CoV-2 N gene<sup>28</sup>, and pepper mild mottle virus M gene (PMMoV)<sup>28</sup> using previously  
121 published assays.

122  
123 All primers and probe sequences (including custom and previously published assays) were  
124 tested *in vitro* for specificity and sensitivity using virus or fungal panels (NATtrol Respiratory  
125 Verification Panel NATRVP2.1-BIO, NATtrol™ EV Panel NATRVPEVP-C, NATCTVPOS-BD),  
126 and genomic and synthetic target nucleic acids purchased from American Type Culture  
127 Collection (ATCC, Manassas, VA) or Twist Biosciences (South San Francisco, CA) (Table 1).  
128 The respiratory virus panel includes chemically inactivated intact influenza viruses,  
129 parainfluenza viruses, adenovirus, rhinovirus A, metapneumovirus, rhinovirus, RSV, several  
130 coronaviruses, and SARS-CoV-2; the EV panel includes chemically inactivated intact  
131 coxsackieviruses, echovirus, and parechovirus. The fungal panel contains chemically  
132 inactivated fungi. Nucleic acids were extracted from intact viruses or cells using Chemagic Viral  
133 DNA/RNA 300 Kit H96 for Chemagic 360 (PerkinElmer, Waltham, MA).

134  
135 Nucleic acids were used undiluted as template in digital droplet (RT-)PCR singleton assays for  
136 sensitivity and specificity testing in single wells. The concentration of targets used in the *in vitro*  
137 specificity testing was between 10<sup>3</sup> and 10<sup>4</sup> copies per well. Negative (RT-)PCR controls were  
138 included on each plate.

139  
140 **Wastewater analyses.** Two wastewater treatment plants that serve 75% (1,500,000 people) of  
141 Santa Clara County, California (San José-Santa Clara Regional Wastewater Facility, SJ) and  
142 25% (250,000 people) of San Francisco County (Oceanside Water Pollution Control Plant,  
143 OSP) were included in the study (Figure 1). Further descriptions of these WWTPs can be found  
144 elsewhere<sup>10,18</sup>.

145  
146 Samples were collected daily for a prospective COVID-19 wastewater monitoring effort starting  
147 in November 2020, and a subset of those samples (two samples per week, 459 samples total)  
148 are used in this study. The samples were chosen to span a 26.5 month period (2/1/21 - 4/14/23,  
149 month/day/year format) that included implementation and easing of indoor mask mandates,  
150 changes in COVID-19 vaccine availability, public health promotion of hand hygiene and mask  
151 wearing, and periods of both high and low COVID-19 incidence.

152  
153 Fifty mL of settled solids were collected using sterile technique in clean bottles from the primary  
154 clarifier. At SJ, twenty-four hour composite samples were collected by combining grab samples

155 from the sludge line every six hours. At OSP, a grab sample was collected from the sludge line  
156 each day. Samples were stored at 4°C, transported to the lab, and processed within six hours.  
157 Solids were then dewatered<sup>29</sup> and frozen at -80°C for 4 - 60 weeks. Samples were thawed  
158 overnight at 4°C and then nucleic acids were obtained from the dewatered solids following  
159 previously published protocols<sup>28,30</sup>. Those protocols include suspending the solids in a buffer at  
160 a concentration of 75 mg/ml and using an inhibitor removal kit; together these processes  
161 alleviate potential inhibition while maintaining good assay sensitivity<sup>28,31</sup>. Nucleic-acids were  
162 obtained from 10 replicate sample aliquots. Each replicate nucleic-acid extract from each  
163 sample was subsequently stored between 8 and 273 days (median 266 days) for SJ and  
164 between 1 and 8 days (median 5 days) for OSP at -80°C and subjected to a single freeze thaw  
165 cycle. Upon thawing, targets were measured immediately using using digital droplet (RT-)PCR  
166 with multiplexed assays for SARS-CoV-2, rotavirus, HAdV, HAV, HuNoV GI, HuNoV GII, WNV,  
167 EVD68, EV, *C. auris*, and PMMoV. PMMoV is highly abundant in human stool and wastewater  
168<sup>32</sup> and is used as an internal recovery and fecal strength control<sup>33</sup>. Each nucleic acid extract was  
169 run in a single well so that 10 replicate wells were run for each sample for each assay.

170  
171 The ddRT-PCR methods applied to wastewater solids to measure PMMoV in a singleplex  
172 reaction and are provided in detail elsewhere<sup>18</sup>. The human virus assays were run in multiplex  
173 using a probe-mixing approach and unique fluorescent molecules (HEX, FAM, Cy5, Cy5.5,  
174 ROX, ATTO950) in two sets of reactions. One reaction included primers and probes for  
175 rotavirus (fluorescent molecule(s) on probe: FAM), SARS-CoV-2 (FAM/HEX), WNV (ROX),  
176 HuNoV GII (ATTO590), and HAdV (ROX/ATTO590). The second included primers and probes  
177 for EVD68 (FAM), HAV (Cy5), EV (Cy5.5), HuNoV GI (ATTO590), and *C. auris*  
178 (ROX/ATTO590). Note that the two reactions contained several additional primers and probe  
179 sets that yielded results not reported herein. In particular, assays targeting the genome of HIV  
180 and several influenza subtype markers were included. Each reaction was run on its own 96-well  
181 plate.

182  
183 Each 96-well PCR plate of wastewater samples included PCR positive controls for each target  
184 assayed on the plate in 1 well, PCR negative no template controls in two wells, and extraction  
185 negative controls (consisting of water and lysis buffer) in two wells. PCR positive controls  
186 consisted of viral gRNA or gene blocks (Table S1).

187  
188 ddRT-PCR was performed on 20 µl samples from a 22 µl reaction volume, prepared using 5.5 µl  
189 template, mixed with 5.5 µl of One-Step RT-ddPCR Advanced Kit for Probes (Bio-Rad  
190 1863021), 2.2 µl of 200 U/µl Reverse Transcriptase, 1.1 µl of 300 mM dithiothreitol (DDT) and  
191 primers and probes mixtures at a final concentration of 900 nM and 250 nM respectively. Primer  
192 and probes for assays were purchased from Integrated DNA Technologies (IDT, San Diego,  
193 CA) (Table 2). Human virus and fungal targets were measured in reactions with undiluted  
194 template whereas PMMoV was run on template diluted 1:100 in molecular grade water.

195  
196 Droplets were generated using the AutoDG Automated Droplet Generator (Bio-Rad, Hercules,  
197 CA). PCR was performed using Mastercycler Pro (Eppendorf, Enfield, CT) with with the  
198 following cycling conditions: reverse transcription at 50°C for 60 minutes, enzyme activation at

199 95°C for 5 minutes, 40 cycles of denaturation at 95°C for 30 seconds and annealing and  
200 extension at 59°C (for human viruses and fungi) or 56°C (for PMMoV) for 30 seconds, enzyme  
201 deactivation at 98°C for 10 minutes then an indefinite hold at 4°C. The ramp rate for  
202 temperature changes were set to 2°C/second and the final hold at 4°C was performed for a  
203 minimum of 30 minutes to allow the droplets to stabilize. Droplets were analyzed using the  
204 QX200 or the QX600 Droplet Reader (Bio-Rad). A well had to have over 10,000 droplets for  
205 inclusion in the analysis. All liquid transfers were performed using the Agilent Bravo (Agilent  
206 Technologies, Santa Clara, CA).

207  
208 Thresholding was done using QuantaSoft™ Analysis Pro Software (Bio-Rad, version 1.0.596)  
209 and QX Manager Software (Bio-Rad, version 2.0). Replicate wells were merged for analysis of  
210 each sample. In order for a sample to be recorded as positive, it had to have at least 3 positive  
211 droplets.

212  
213 Concentrations of RNA targets were converted to concentrations in units of copies (cp)/g dry  
214 weight using dimensional analysis. The total error is reported as standard deviations and  
215 includes the errors associated with the Poisson distribution and the variability among the 10  
216 replicates. Three positive droplets across 10 merged wells corresponds to a concentration  
217 between ~500-1000 cp/g; the range in values is a result of the range in the equivalent mass of  
218 dry solids added to the wells. Data collected as part of the retrospective study are available from  
219 the Stanford Digital Repository (<https://purl.stanford.edu/qt551tn4819>).

220  
221 **Multiplex assay performance.** Digital droplet PCR is well suited for multiplexing. This is  
222 because of the inherent design of the method; there is unlikely to be more than one target  
223 nucleic acid per droplet when assaying samples for rare targets like human pathogens.  
224 Regardless, we sought to confirm that the multiplexing up to eight assays in one well did not  
225 interfere with the quantification of targets. In particular, we tested whether the quantification of a  
226 single target in the presence of and absence of relatively high concentrations of the 7 other  
227 targets was substantially different. To do so, we first quantified three decimal dilutions of a  
228 target nucleic acid in the absence of any other targets using the (RT)-PCR chemistry that  
229 included primers and probes for all 8 targets. Then, we quantified the same decimal dilutions of  
230 the single target in the presence of relatively high concentrations of standards of the 7 other  
231 targets. Each dilution was run in a single well and no template, negative controls were included  
232 on each PCR plate. Assays were run and thresholded as described above. Results were  
233 expressed as copies per reaction and the 68% confidence intervals, as output by the  
234 instrument, were included.

235  
236 **SARS-CoV-2 and PMMoV RNA concentrations from prospective study in fresh samples.**

237 In order to understand potential losses from storage and freeze thaw of the samples and their  
238 nucleic acid extracts, we compared measurements of the SARS-CoV-2 N gene and PMMoV  
239 RNA measured in this study obtained using the stored samples to measurements from the  
240 same samples that were not stored and analyzed prospectively for a large monitoring effort;  
241 samples were analyzed within hours of sample collection. The methods for analysis for the N  
242 gene through 3/13/23 were identical to those previously described in a Data Descriptor<sup>28</sup> with

243 the exact same approaches described in this paper except the assay was multiplexed with two  
244 other assays using a two color droplet reader (QX200, Bio-rad). Between 3/13/23 and 4/15/23,  
245 the N gene was multiplexed with assays for five adjacent SNPs in SARS-CoV-2 XBB\*,  
246 respiratory syncytial virus (RSV), influenza A, influenza B, and HuNoV GII in conjunction with a  
247 6-color droplet reader (QX600, Bio-rad).

248

## 249 **Results & Discussion**

250

251 **QA/QC.** Results are reported as suggested in the Environmental Microbiology Minimal  
252 Information guidelines<sup>34</sup> (Figure S2). Extraction and PCR negative and positive controls  
253 performed as expected (negative and positive, respectively). PMMoV measurements were used  
254 to assess potential for gross extraction failures as it is present in very high concentrations in the  
255 samples naturally, and lack of its detection, or abnormally low measurements might indicate  
256 gross extraction failures. The median (interquartile range) log<sub>10</sub>-transformed PMMoV was 9.1  
257 (9.0-9.2) and 8.7 (8.6-8.8) log<sub>10</sub> copies/g at SJ and OSP, respectively. The lowest  
258 measurements at the two sites were 8.5 (SJ) and 8.1 (OSP) log<sub>10</sub> copies/g and given these  
259 lowest values are within an order of magnitude of the medians, we concluded that there was no  
260 gross extraction failures. We opted to not use an exogenous viral control, like bovine  
261 coronavirus, owing to the complexities associated with interpreting recovery of an exogenous  
262 spiked control in environmental samples<sup>35</sup>, and its potential to interfere with other uses of the  
263 samples, for example viral metagenomics.

264

265 We compared measurements of the N gene and PMMoV made on the samples that were fresh  
266 to those used in this study that were stored, and for which the RNA underwent one freeze thaw.  
267 Median ratio of PMMoV measurements made in this study to those made using fresh samples  
268 was 0.9 (0.6-1.2) at SJ and 1.0 (0.7-1.4) at OSP suggesting limited degradation of the PMMoV  
269 target in the stored and freeze thawed samples. Median ratio of SARS-CoV-2 N gene  
270 measurements made in this study to those made using fresh samples was 0.2 (0.1-0.3) at SJ  
271 and 0.4 (0.2-0.6) at OSP suggesting storage and freeze thaw may have reduced measurement  
272 concentrations, but by less than an order of magnitude. Although not ideal, storage of samples  
273 is essential for retrospective work like this.

274

275 **Assay sensitivity and specificity.** We tested previously published assays for sensitivity and  
276 specificity. In silico analysis indicated no cross reactivity of the (RT-)PCR probe-based assays  
277 (Table 2) with sequences deposited in National Center for Biotechnology Information (NCBI); in  
278 vitro testing against non-target and target viral or fungal nucleic-acids also indicated no cross  
279 reactivity. The exception was the previously published assay for EVD68 developed by Wylie et  
280 al.<sup>21</sup> in 2015. In silico and in vitro testing indicated the assay was not able to detect the variant of  
281 EVD68 circulating in winter 2022 (EVD68-2022). We therefore developed a new set of primers,  
282 and modified the probe to include a degeneracy, to amplify and detect the same region of the  
283 VP1 gene targeted by the Wylie et al. assay. The EVD68 assay used herein therefore includes  
284 two forward and reverse primers in order to ensure detection of all EVD68 variants in NCBI  
285 including EVD68-2022. We confirmed that the new assay, with two sets of probes and the

286 modified probe, was sensitive and specific in silico and in vitro to both the EVD68-2022 strains  
287 and the EVD68 historical strains. .

288  
289 We developed a new assay for HAdV. We confirmed assay sensitivity and specificity in silico. In  
290 vitro, there was no cross reactivity between the HAdV assay and non-target viral genomic  
291 nucleic acids. We developed a probe to use in conjunction with previously published primers for  
292 *C. auris*. The newly designed assay was also sensitivity and specific based on in vitro and in  
293 silico analysis.

294  
295 In this project, we multiplexed eight different hydrolysis-probe assays in each reaction. We  
296 tested whether quantification of a target in the multiplex was affected by the presence of the 7  
297 other nucleic-acid targets. We found that the concentration of each target was not affected by  
298 the presence of a high concentration or orthogonal targets as background (Figure 2). This is  
299 evidenced by the fact that target nucleic-acid concentrations measured in the absence and  
300 presence of background orthogonal nucleic acids are similar across the decimal dilutions tested.

301  
302 **Enteric viruses in wastewater solids.** Concentrations of EV, HAdV, rotavirus, HuNoV GI, and  
303 HuNoV GII nucleic-acids in wastewater solids over the project are shown in Figure 3. Figure S2  
304 shows concentrations normalized by PMMoV. All targets were detected in wastewater solids  
305 throughout the study with most showing season patterns with higher concentrations in the winter  
306 2021-2022 and 2022-2023, but not in winter 2020-2021. The exception is EV which was present  
307 even at relatively high concentrations in winter 2020-2021. Viral enteric infections are seasonal  
308 with higher rates in the winter months<sup>36</sup>, so the seasonal patterns in the wastewater are  
309 consistent with that. The lack of a winter peak in the winter of 2020-2021 may be a result of the  
310 non-pharmaceutical interventions in place during the COVID-19 pandemic which may have  
311 limited the spread of different infections.

312  
313 Median concentrations of each enteric viral target were significantly higher at SJ relative to OSP  
314 (Mann-Whitney U Test, all  $p < 0.05$ ) but the effect size was less than 1 order of magnitude (Table  
315 3). Interestingly, median concentrations of PMMoV were also higher at SJ, and the normalized  
316 concentrations of these targets are more comparable (Figure S2). Within each WWTP, median  
317 concentrations of the different viruses ranked highest to lowest were HAdV (highest median  
318 concentration of  $5.8 \times 10^5$  and  $1.9 \times 10^6$  cp/g for OSP and SJ, respectively) followed by HuNoV GII  
319 ( $5.7 \times 10^5$  and  $7.0 \times 10^5$  cp/g for OSP and SJ, respectively), EV ( $4.1 \times 10^4$  and  $5.4 \times 10^4$  cp/g for  
320 OSP and SJ, respectively), HuNoV GI ( $2.8 \times 10^4$  and  $3.4 \times 10^4$  cp/g for OSP and SJ, respectively),  
321 and rotavirus with the lowest ( $1 \times 10^3$  and  $3.3 \times 10^3$  cp/g for OSP and SJ, respectively) (Table 3).  
322 Other summary statistics (25th and 75th percentiles, maximums and number of non-detects)  
323 generally follow the same pattern.

324  
325 Rotavirus has previously been reported to be present in wastewater sludge around the world<sup>37-</sup>  
326 <sup>39</sup>, but quantitative data on its concentration, to our knowledge, have not been reported. In the  
327 present study, we observed concentrations in wastewater solids up to  $10^5$  cp/g with median  
328 concentrations on the order of  $10^3$  cp/g. Concentrations of rotavirus, using both molecular  
329 methods and microscopy, in raw sewage has been previously reported to be between 1 and  $10^5$



330 cp/ml<sup>40-42</sup> and as high as 100 fluorescent foci per ml<sup>43,44</sup> with some authors reporting seasonal  
331 occurrence<sup>44</sup>. The measurements in this study also exhibited a seasonal occurrence with higher  
332 concentrations in the winter-spring season. A number of studies have investigated different  
333 genotypes of rotavirus in sewage using sequencing methods<sup>41</sup> and this may be an interesting  
334 area for further research within wastewater-based epidemiology applications. In our study area,  
335 oral, live rotavirus vaccines are administered to infants less than 32 weeks of age, and as a  
336 result, cases of rotavirus have decreased since vaccine introduction<sup>45</sup>. Based on available  
337 sequences of the rotavirus vaccine, the rotavirus assay used in our study may amplify and  
338 detect genomic RNA from the vaccine. As infants in our study area wear diapers, including both  
339 disposable and cloth, it is unclear to what extent the vaccine strains from infants will appear in  
340 wastewater and contribute to the measurements reported herein. However, as vaccine strains  
341 are live, transmission to others who do use the wastewater system may be possible<sup>46</sup>, with their  
342 shedding possibly influencing concentrations of rotavirus RNA in the waste stream.

343  
344 As with rotavirus, there are limited reports of HuNoV GII and GI in wastewater solids<sup>37</sup> with  
345 some exceptions. Boehm et al.<sup>16</sup> report concentrations of HuNoV GII in wastewater solids from  
346 these same plants from a different set of samples and found similar concentrations, but they did  
347 not report concentrations of HuNoV GI. There is a large number of studies reporting HuNoV in  
348 raw sewage, many of which are described in a systematic review by Eftim et al.<sup>47</sup> They report  
349 median concentrations globally of 10-100 cp/ml with concentrations of HuNoV GII higher than  
350 GI, particularly in North America. This is consistent with our findings that indicate that HuNoV GI  
351 is present at an order of magnitude lower concentrations than HuNoV GII. Seasonal variation of  
352 HuNoV in sewage has been reported<sup>8,47</sup>, also consistent with the higher levels we observe in  
353 wastewater solids in this study in the winter to spring.

354  
355 The EV assay we used in this study is a pan-Enterovirus genus assay and therefore detects a  
356 number of different viruses including coxsackieviruses, enteroviruses, and echoviruses. The  
357 diversity of viruses detected with this assay, and the diversity of diseases associated with them,  
358 including meningitis, diarrheal disease, hand-foot-and-mouth disease, and respiratory disease,  
359 may explain why the concentrations observed in the present study lack clear seasonal patterns  
360 as might be expected for viruses that cause single diseases<sup>36</sup>. Enteroviruses have been  
361 measured extensively in wastewater<sup>48,49</sup>, and their presence in sludge has been  
362 documented<sup>13,50</sup>. Monpoeho et al.<sup>50</sup> reported up to 23,000 copies of EV RNA per gram of  
363 sludge, strikingly consistent with the concentrations observed in this study (median ~ 10<sup>4</sup> cp/g).  
364 Concentrations of enteroviruses in raw liquid sewage can range from non-detect to 1000 cp/ml  
365 depending on location<sup>48</sup>. Enteroviruses have been shown to preferentially adsorb to wastewater  
366 solids<sup>13</sup>, but the degree of sorption is governed by the type of enterovirus<sup>51</sup>.

367  
368 The HAdV assay used in this study targets group F which includes adenovirus 40 and 41; both  
369 cause diarrheal illness. HAdV has been documented at relatively high concentrations in raw  
370 sewage (~10<sup>3</sup> viruses/ml) at locations around the world<sup>52-54</sup>. Consistent with those reports, we  
371 also found HAdV at the highest concentration of all the viruses tested in wastewater solids in  
372 this study. HAdV has previously been reported to preferentially adsorb to wastewater solids<sup>13</sup>  
373 where it can be found at concentrations 10<sup>4</sup> higher than in the liquid phase on a per mass basis.

374 Martin et al.<sup>55</sup> and Reyne et al.<sup>56</sup> reported that concentrations of HAdV F41 in wastewater  
375 influent in Ireland correlated with laboratory confirmed adenovirus F41 infections and showed a  
376 seasonal trend in both, with high occurrence of infections and high concentrations in wastewater  
377 in the winter-spring seasons. We also observed some evidence of seasonal changes in HAdV  
378 concentrations in wastewater solids, but that pattern appears to be more pronounced in SJ  
379 compared to OSP.

380  
381 **Hepatitis A virus (HAV).** We detected HAV in approximately 50% of the wastewater solids  
382 samples from SJ, but only 5% of the samples from OSP. Median concentrations were non-  
383 detect at OSP and  $6.6 \times 10^2$  cp/g at SJ with little evidence of seasonality. The lack of clear  
384 seasonality is consistent with reports that HAV infections typically are not seasonal<sup>57</sup>. HAV has  
385 been detected in raw sewage globally<sup>58</sup>. Hellmer et al.<sup>59</sup> measured HAV in wastewater influent  
386 up to 14 cp/ml<sup>59</sup>, and found genotypically identical strains in wastewater and clinical samples.  
387 Like our measurements, they found a high degree of variability in their measurements and  
388 suggested that due to high levels of shedding of the virus by infected patients, even a single  
389 infection could cause large spikes in wastewater concentrations followed by non-detectable  
390 concentrations. McCall et al.<sup>11</sup> measured HAV in wastewater influent during a HAV outbreak in  
391 Michigan and report median concentrations of  $10^3$  cp/ml; the authors also showed a significant  
392 positive correlation between wastewater measurements and the number of laboratory confirmed  
393 incident HAV cases. There is little data on HAV in wastewater solids; in their review, Yin et al.<sup>13</sup>  
394 identified one study<sup>60</sup> that indicated HAV partitioning to solids.

395  
396 **Enterovirus D68 (EVD68).** EVD68 was non-detect in all samples except for those collected in  
397 the fall 2022. During this season, EVD68 RNA concentrations increased coherently and  
398 dramatically across the two WWTPs over ~ 6 weeks starting in mid-August to reach a peak in  
399 early October 2022, and then reaching non-detect again by the end of December 2022. The  
400 highest concentration observed was 72,000 cp/g at OSP and 280,000 cp/g at SJ.

401  
402 A similar seasonal pattern in EVD68 in wastewater in 2022 was reported in Texas<sup>61</sup>, as well as  
403 in Israel<sup>62</sup> and the United Kingdom<sup>63</sup>. The study in Israel reports good agreement between  
404 wastewater concentrations of EVD68 and confirmed laboratory cases of EVD68 infections<sup>62</sup>.  
405 These previous studies did not report EVD68 nucleic acid concentrations in externally valid units  
406 (they reported presence/absence or copies per reaction, or proportions of all viruses), so a  
407 comparison of concentrations to those reported herein is not possible. EVD68 adsorption to  
408 wastewater solids has not been previously reported.

409  
410 **Candida auris.** *C. auris* was not detected in any sample from SJ, but was detected in 28 of 230  
411 (12%) samples from OSP. The highest concentration detected at OSP was 4000 cp/g. Detection  
412 of *C. auris* at OSP was most frequent between mid July 2021 and mid October 2021. *C. auris* is  
413 a drug resistant fungal pathogen that emerged in 2009<sup>64</sup>. Previous studies have reported  
414 detection of *C. auris* in wastewater influent at concentrations of 1 to 1000 cp/ml, and suggested  
415 its presence is associated with confirmed infections and illnesses in the communities  
416 contributing to the wastewater<sup>12</sup>. *C. auris* is 2.5 - 5.0  $\mu\text{m}$  in diameter<sup>65</sup> and thus is, by definition,  
417 a particle and is expected to be in the solid fraction of wastewater.

418

419 **West Nile Virus (WNV).** WNV is an arbovirus spread by mosquitoes. We did not detect WNV  
420 nucleic-acids in any samples - all measurements were below the lower limit of detection. This  
421 finding is consistent with the lack of reporting of WNV infections in the communities served by  
422 the two WWTPs (<https://westnile.ca.gov/>). To our knowledge, WNV nucleic acids have not been  
423 detected in wastewater. Lee et al.<sup>66</sup> recently reported on challenges and opportunities  
424 associated with arbovirus surveillance using wastewater.

## 425 **Conclusion**

426 This study validated and implemented a suite of digital (RT-)PCR assays to detect human  
427 rotavirus, adenovirus group F, norovirus GI and GII, West Nile virus, hepatitis A virus, enterovirus,  
428 enterovirus D68, and the fungal pathogen *C. auris*. The work presented here builds upon  
429 previous research illustrating these targets are present in wastewater, and lays a foundation for  
430 the use of solids for the detection of these infectious disease targets.

431 **Acknowledgements.** We acknowledge the numerous people at San Jose and Oceanside  
432 wastewater treatment plants who contributed to wastewater sample collection and Allegra Koch  
433 for her support with literature review. This research was performed on the ancestral and  
434 unceded lands of the Muwekma Ohlone people. We pay our respects to them and their Elders,  
435 past and present, and are grateful for the opportunity to live and work here.

436 **Competing interests.** BW, BH, and DD are employees of Verily Life Sciences, LLC.

437

438

439

440

441

442

443

444

445

446

447

448

449

## 450 References

451

- 452 (1) Bhutta, Z. A.; Sommerfeld, J.; Lassi, Z. S.; Salam, R. A.; Das, J. K. Global Burden,  
453 Distribution, and Interventions for Infectious Diseases of Poverty. *Infectious Diseases of*  
454 *Poverty* **2014**, 3 (1), 21. <https://doi.org/10.1186/2049-9957-3-21>.
- 455 (2) Lafferty, K. D. The Ecology of Climate Change and Infectious Diseases. *Ecology* **2009**, 90  
456 (4), 888–900. <https://doi.org/10.1890/08-0079.1>.
- 457 (3) Altizer, S.; Ostfeld, R. S.; Johnson, P. T. J.; Kutz, S.; Harvell, C. D. Climate Change and  
458 Infectious Diseases: From Evidence to a Predictive Framework. *Science* **2013**, 341 (6145),  
459 514–519. <https://doi.org/10.1126/science.1239401>.
- 460 (4) Wu, F.; Zhang, J.; Xiao, A.; Gu, X.; Lee, W. L.; Armas, F.; Kauffman, K.; Hanage, W.;  
461 Matus, M.; Ghaeli, N.; Endo, N.; Duvallet, C.; Poyet, M.; Moniz, K.; Washburne, A. D.;  
462 Erickson, T. B.; Chai, P. R.; Thompson, J.; Alm, E. J. SARS-CoV-2 Titers in Wastewater  
463 Are Higher than Expected from Clinically Confirmed Cases. *mSystems* **2020**, 5 (4),  
464 e00614-20. <https://doi.org/10.1128/mSystems.00614-20>.
- 465 (5) Mercier, E.; D’Aoust, P. M.; Thakali, O.; Hegazy, N.; Jia, J.-J.; Zhang, Z.; Eid, W.; Plaza-  
466 Diaz, J.; Kabir, M. P.; Fang, W.; Cowan, A.; Stephenson, S. E.; Pisharody, L.; MacKenzie,  
467 A. E.; Graber, T. E.; Wan, S.; Delatolla, R. Municipal and Neighbourhood Level  
468 Wastewater Surveillance and Subtyping of an Influenza Virus Outbreak. *Scientific Reports*  
469 **2022**, 12 (1), 15777. <https://doi.org/10.1038/s41598-022-20076-z>.
- 470 (6) Boehm, A. B.; Hughes, B.; Duong, D.; Chan-Herur, V.; Buchman, A.; Wolfe, M. K.; White,  
471 B. J. Wastewater Concentrations of Human Influenza, Metapneumovirus, Parainfluenza,  
472 Respiratory Syncytial Virus, Rhinovirus, and Seasonal Coronavirus Nucleic-Acids during  
473 the COVID-19 Pandemic: A Surveillance Study. *The Lancet Microbe* **2023**, 4 (5), e340–  
474 e348. [https://doi.org/10.1016/S2666-5247\(22\)00386-X](https://doi.org/10.1016/S2666-5247(22)00386-X).
- 475 (7) Hughes, B.; Duong, D.; White, B. J.; Wigginton, K. R.; Chan, E. M. G.; Wolfe, M. K.;  
476 Boehm, A. B. Respiratory Syncytial Virus (RSV) RNA in Wastewater Settled Solids  
477 Reflects RSV Clinical Positivity Rates. *Environ. Sci. Technol. Lett.* **2022**, 9 (2), 173–178.  
478 <https://doi.org/10.1021/acs.estlett.1c00963>.
- 479 (8) Guo, Y.; Li, J.; O’Brien, J.; Sivakumar, M.; Jiang, G. Back-Estimation of Norovirus  
480 Infections through Wastewater-Based Epidemiology: A Systematic Review and Parameter  
481 Sensitivity. *Water Research* **2022**, 219, 118610.  
482 <https://doi.org/10.1016/j.watres.2022.118610>.
- 483 (9) Diemert, S.; Yan, T. Clinically Unreported Salmonellosis Outbreak Detected via  
484 Comparative Genomic Analysis of Municipal Wastewater Salmonella Isolates. *Appl.*  
485 *Environ. Microbiol.* **2019**, 85 (10), e00139-19. <https://doi.org/10.1128/AEM.00139-19>.
- 486 (10) Wolfe, M. K.; Yu, A. T.; Duong, D.; Rane, M. S.; Hughes, B.; Chan-Herur, V.; Donnelly, M.;  
487 Chai, S.; White, B. J.; Vugia, D. J.; Boehm, A. B. Use of Wastewater for Mpox Outbreak  
488 Surveillance in California. *N Engl J Med* **2023**. <https://doi.org/10.1056/NEJMc2213882>.
- 489 (11) McCall, C.; Wu, H.; O’Brien, E.; Xagorarakis, I. Assessment of Enteric Viruses during a  
490 Hepatitis Outbreak in Detroit MI Using Wastewater Surveillance and Metagenomic  
491 Analysis. *Journal of Applied Microbiology* **2021**, 131 (3), 1539–1554.  
492 <https://doi.org/10.1111/jam.15027>.
- 493 (12) Barber, C.; Crank, K.; Papp, K.; Innes, G. K.; Schmitz, B. W.; Chavez, J.; Rossi, A.;

- 494 Gerrity, D. Community-Scale Wastewater Surveillance of *Candida Auris* during an Ongoing  
495 Outbreak in Southern Nevada. *Environ. Sci. Technol.* **2023**, *57* (4), 1755–1763.  
496 <https://doi.org/10.1021/acs.est.2c07763>.
- 497 (13) Yin, Z.; Voice, T.; Tarabara, V.; Xagorarakis, I. Sorption of Human Adenovirus to  
498 Wastewater Solids. *Journal of Environmental Engineering* **2018**, *144* (11), 06018008.  
499 [https://doi.org/10.1061/\(ASCE\)EE.1943-7870.0001463](https://doi.org/10.1061/(ASCE)EE.1943-7870.0001463).
- 500 (14) Wolfe, M. K.; Duong, D.; Bakker, K. M.; Ammerman, M.; Mortenson, L.; Hughes, B.; Arts,  
501 P.; Luring, A. S.; Fitzsimmons, W. J.; Bendall, E.; Hwang, C. E.; Martin, E. T.; White, B.  
502 J.; Boehm, A. B.; Wigginton, K. R. Wastewater-Based Detection of Two Influenza  
503 Outbreaks. *Environ. Sci. Technol. Lett.* **2022**, *9* (8), 687–692.  
504 <https://doi.org/10.1021/acs.estlett.2c00350>.
- 505 (15) Kim, S.; Kennedy, L. C.; Wolfe, M. K.; Criddle, C. S.; Duong, D. H.; Topol, A.; White, B. J.;  
506 Kantor, R. S.; Nelson, K. L.; Steele, J. A.; Langlois, K.; Griffith, J. F.; Zimmer-Faust, A. G.;  
507 McLellan, S. L.; Schussman, M. K.; Ammerman, M.; Wigginton, K. R.; Bakker, K. M.;  
508 Boehm, A. B. SARS-CoV-2 RNA Is Enriched by Orders of Magnitude in Primary Settled  
509 Solids Relative to Liquid Wastewater at Publicly Owned Treatment Works. *Environ. Sci.:*  
510 *Water Res. Technol.* **2022**. <https://doi.org/10.1039/D1EW00826A>.
- 511 (16) Boehm, A. B.; Wolfe, M. K.; White, B.; Hughes, B.; Duong, D.; Banaei, N.; Bidwell, A.  
512 Human Norovirus (HuNoV) GII RNA in Wastewater Solids at 145 United States  
513 Wastewater Treatment Plants: Comparison to Positivity Rates of Clinical Specimens and  
514 Modeled Estimates of HuNoV GII Shedders. *Journal of Exposure Science & Environmental*  
515 *Epidemiology* **2023**. <https://doi.org/10.1038/s41370-023-00592-4>.
- 516 (17) D’Aoust, P. M.; Mercier, E.; Montpetit, D.; Jia, J.-J.; Alexandrov, I.; Neault, N.; Baig, A. T.;  
517 Mayne, J.; Zhang, X.; Alain, T.; Langlois, M.-A.; Servos, M. R.; MacKenzie, M.; Figeys, D.;  
518 MacKenzie, A. E.; Graber, T. E.; Delatolla, R. Quantitative Analysis of SARS-CoV-2 RNA  
519 from Wastewater Solids in Communities with Low COVID-19 Incidence and Prevalence.  
520 *Water Research* **2021**, *188*, 116560. <https://doi.org/10.1016/j.watres.2020.116560>.
- 521 (18) Wolfe, M. K.; Topol, A.; Knudson, A.; Simpson, A.; White, B.; Duc, V.; Yu, A.; Li, L.; Balliet,  
522 M.; Stoddard, P.; Han, G.; Wigginton, K. R.; Boehm, A. High-Frequency, High-Throughput  
523 Quantification of SARS-CoV-2 RNA in Wastewater Settled Solids at Eight Publicly Owned  
524 Treatment Works in Northern California Shows Strong Association with COVID-19  
525 Incidence. *mSystems* **2021**, *6* (5), e00829-21. <https://doi.org/10.1128/mSystems.00829-21>.
- 526 (19) Peccia, J.; Zulli, A.; Brackney, D. E.; Grubaugh, N. D.; Kaplan, E. H.; Casanovas-Massana,  
527 A.; Ko, A. I.; Malik, A. A.; Wang, D.; Wang, M.; Warren, J. L.; Weinberger, D. M.; Omer, S.  
528 B. SARS-CoV-2 RNA Concentrations in Primary Municipal Sewage Sludge as a Leading  
529 Indicator of COVID-19 Outbreak Dynamics. *Nature Biotechnology* **2020**, *38*, 1164–1167.
- 530 (20) Kordalewska, M.; Zhao, Y.; Lockhart, S. R.; Chowdhary, A.; Berrio, I.; Perlin, D. S. Rapid  
531 and Accurate Molecular Identification of the Emerging Multidrug-Resistant Pathogen  
532 *Candida Auris*. *Journal of Clinical Microbiology* **2017**, *55* (8), 2445–2452.  
533 <https://doi.org/10.1128/jcm.00630-17>.
- 534 (21) Wylie, T. N.; Wylie, K. M.; Buller, R. S.; Cannella, M.; Storch, G. A. Development and  
535 Evaluation of an Enterovirus D68 Real-Time Reverse Transcriptase PCR Assay. *Journal of*  
536 *Clinical Microbiology* **2015**, *53* (8), 2641–2647. <https://doi.org/10.1128/jcm.00923-15>.
- 537 (22) Jothikumar, N.; Kang, G.; Hill, V. R. Broadly Reactive TaqMan® Assay for Real-Time RT-  
538 PCR Detection of Rotavirus in Clinical and Environmental Samples. *Journal of Virological*  
539 *Methods* **2009**, *155* (2), 126–131. <https://doi.org/10.1016/j.jviromet.2008.09.025>.
- 540 (23) Jothikumar, N.; Cromeans, T. L.; Sobsey, M. D.; Robertson, B. H. Development and  
541 Evaluation of a Broadly Reactive TaqMan Assay for Rapid Detection of Hepatitis A Virus.  
542 *Applied and Environmental Microbiology* **2005**, *71* (6), 3359–3363.  
543 <https://doi.org/10.1128/AEM.71.6.3359-3363.2005>.
- 544 (24) Jothikumar Narayanan; Lowther James A.; Henshilwood Kathleen; Lees David N.; Hill

- 545 Vincent R.; Vinjé Jan. Rapid and Sensitive Detection of Noroviruses by Using TaqMan-  
546 Based One-Step Reverse Transcription-PCR Assays and Application to Naturally  
547 Contaminated Shellfish Samples. *Applied and Environmental Microbiology* **2005**, *71* (4),  
548 1870–1875. <https://doi.org/10.1128/AEM.71.4.1870-1875.2005>.
- 549 (25) Loisy, F.; Atmar, R. L.; Guillon, P.; Le Cann, P.; Pommepuy, M.; Le Guyader, F. Real-Time  
550 RT-PCR for Norovirus Screening in Shellfish. *Journal of Virological Methods* **2005**, *123* (1),  
551 1–7.
- 552 (26) Gregory, J. B.; Litaker, R. W.; Noble, R. T. Rapid One-Step Quantitative Reverse  
553 Transcriptase PCR Assay with Competitive Internal Positive Control for Detection of  
554 Enteroviruses in Environmental Samples. *Applied and Environmental Microbiology* **2006**,  
555 *72* (6), 3960–3967.
- 556 (27) Lanciotti, R. S.; Kerst, A. J.; Nasci, R. S.; Godsey, M. S.; Mitchell, C. J.; Savage, H. M.;  
557 Komar, N.; Panella, N. A.; Allen, B. C.; Volpe, K. E.; Davis, B. S.; Roehrig, J. T. Rapid  
558 Detection of West Nile Virus from Human Clinical Specimens, Field-Collected Mosquitoes,  
559 and Avian Samples by a TaqMan Reverse Transcriptase-PCR Assay. *Journal of Clinical*  
560 *Microbiology* **2000**, *38* (11), 4066–4071. [https://doi.org/10.1128/jcm.38.11.4066-](https://doi.org/10.1128/jcm.38.11.4066-4071.2000)  
561 [4071.2000](https://doi.org/10.1128/jcm.38.11.4066-4071.2000).
- 562 (28) Boehm, A. B.; Wolfe, M. K.; Wigginton, K. R.; Bidwell, A.; White, B. J.; Hughes, B.; Duong;  
563 Chan-Herur, V.; Bischel, H. N.; Naughton, C. C. Human Viral Nucleic Acids Concentrations  
564 in Wastewater Solids from Central and Coastal California USA. *Scientific Data* **2023**, *10*,  
565 396.
- 566 (29) Topol, A.; Wolfe, M.; White, B.; Wigginton, K.; Boehm, A. High Throughput Pre-Analytical  
567 Processing of Wastewater Settled Solids for SARS-CoV-2 RNA Analyses. *protocols.io*  
568 **2021**. <https://doi.org/dx.doi.org/10.17504/protocols.io.btyqnpvw>.
- 569 (30) Topol, A.; Wolfe, M.; Wigginton, K.; White, B.; Boehm, A. High Throughput RNA Extraction  
570 and PCR Inhibitor Removal of Settled Solids for Wastewater Surveillance of SARS-CoV-2  
571 RNA. *protocols.io* **2021**. <https://doi.org/dx.doi.org/10.17504/protocols.io.btyrnpv6>.
- 572 (31) Huisman, J. S.; Scire, J.; Caduff, L.; Fernandez-Cassi, X.; Ganesanandamoorthy, P.; Kull,  
573 A.; Scheidegger, A.; Stachler, E.; Boehm, A. B.; Hughes, B.; Knudson, A.; Topol, A.;  
574 Wigginton, K. R.; Wolfe, M. K.; Kohn, T.; Ort, C.; Stadler, T.; Julian, T. R. Wastewater-  
575 Based Estimation of the Effective Reproductive Number of SARS-CoV-2. *Environmental*  
576 *Health Perspectives* **2022**, *130* (5), 057011–1.
- 577 (32) Symonds, E. M.; Nguyen, K. H.; Harwood, V. J.; Breitbart, M. Pepper Mild Mottle Virus: A  
578 Plant Pathogen with a Greater Purpose in (Waste)Water Treatment Development and  
579 Public Health Management. *Water Research* **2018**, *144*, 1–12.  
580 <https://doi.org/10.1016/j.watres.2018.06.066>.
- 581 (33) Simpson, A.; Boehm, A. B. *Effect of storage on concentrations of SARS-CoV-2 RNA in*  
582 *settled solids of wastewater treatment plants*. Stanford Digital Repository.  
583 [purl.stanford.edu/yn042kx5009](https://purl.stanford.edu/yn042kx5009).
- 584 (34) Borchardt, M. A.; Boehm, A. B.; Salit, M.; Spencer, S. K.; Wigginton, K. R.; Noble, R. T.  
585 The Environmental Microbiology Minimum Information (EMMI) Guidelines: QPCR and  
586 DPCR Quality and Reporting for Environmental Microbiology. *Environ. Sci. Technol.* **2021**,  
587 *55* (15), 10210–10223. <https://doi.org/10.1021/acs.est.1c01767>.
- 588 (35) Kantor, R. S.; Nelson, K. L.; Greenwald, H. D.; Kennedy, L. C. Challenges in Measuring  
589 the Recovery of SARS-CoV-2 from Wastewater. *Environ. Sci. Technol.* **2021**, *55* (6),  
590 3514–3519. <https://doi.org/10.1021/acs.est.0c08210>.
- 591 (36) Fisman, D. Seasonality of Viral Infections: Mechanisms and Unknowns. *Clinical*  
592 *Microbiology and Infection* **2012**, *18* (10), 946–954. [https://doi.org/10.1111/j.1469-](https://doi.org/10.1111/j.1469-0691.2012.03968.x)  
593 [0691.2012.03968.x](https://doi.org/10.1111/j.1469-0691.2012.03968.x).
- 594 (37) Gholipour, S.; Ghalhari, M. R.; Nikaeen, M.; Rabbani, D.; Pakzad, P.; Miranzadeh, M. B.  
595 Occurrence of Viruses in Sewage Sludge: A Systematic Review. *Science of The Total*

- 596 *Environment* **2022**, 824, 153886. <https://doi.org/10.1016/j.scitotenv.2022.153886>.
- 597 (38) Bibby, K.; Peccia, J. Identification of Viral Pathogen Diversity in Sewage Sludge by  
598 Metagenome Analysis. *Environ. Sci. Technol.* **2013**, 47 (4), 1945–1951.  
599 <https://doi.org/10.1021/es305181x>.
- 600 (39) Kittigul, L.; Pombubpa, K. Rotavirus Surveillance in Tap Water, Recycled Water, and  
601 Sewage Sludge in Thailand: A Longitudinal Study, 2007–2018. *Food and Environmental*  
602 *Virology* **2021**, 13 (1), 53–63. <https://doi.org/10.1007/s12560-020-09450-0>.
- 603 (40) Silva-Sales, M.; Martínez-Puchol, S.; Gonzales-Gustavson, E.; Hundesa, A.; Gironès, R.  
604 High Prevalence of Rotavirus A in Raw Sewage Samples from Northeast Spain. *Viruses*  
605 **2020**, 12 (3). <https://doi.org/10.3390/v12030318>.
- 606 (41) Zhou, N.; Lv, D.; Wang, S.; Lin, X.; Bi, Z.; Wang, H.; Wang, P.; Zhang, H.; Tao, Z.; Hou, P.;  
607 Song, Y.; Xu, A. Continuous Detection and Genetic Diversity of Human Rotavirus A in  
608 Sewage in Eastern China, 2013–2014. *Virology Journal* **2016**, 13 (1), 153.  
609 <https://doi.org/10.1186/s12985-016-0609-0>.
- 610 (42) Barril, P. A.; Fumian, T. M.; Prez, V. E.; Gil, P. I.; Martínez, L. C.; Giordano, M. O.;  
611 Masachessi, G.; Isa, M. B.; Ferreyra, L. J.; Ré, V. E.; Miagostovich, M.; Pavan, J. V.;  
612 Nates, S. V. Rotavirus Seasonality in Urban Sewage from Argentina: Effect of  
613 Meteorological Variables on the Viral Load and the Genetic Diversity. *Environmental*  
614 *Research* **2015**, 138, 409–415. <https://doi.org/10.1016/j.envres.2015.03.004>.
- 615 (43) Bosch, A.; Pinto, R. M.; Blanch, A. R.; Jofre, J. T. Detection of Human Rotavirus in  
616 Sewage through Two Concentration Procedures. *Water Research* **1988**, 22 (3), 343–348.  
617 [https://doi.org/10.1016/S0043-1354\(88\)90200-X](https://doi.org/10.1016/S0043-1354(88)90200-X).
- 618 (44) Hejkal, T. W.; Smith, E. M.; Gerba, C. P. Seasonal Occurrence of Rotavirus in Sewage.  
619 *Applied and Environmental Microbiology* **1984**, 47 (3), 588–590.  
620 <https://doi.org/10.1128/aem.47.3.588-590.1984>.
- 621 (45) Rha, B.; Tate, J. E.; Payne, D. C.; Cortese, M. M.; Lopman, B. A.; Curns, A. T.; Parashar,  
622 U. D. Effectiveness and Impact of Rotavirus Vaccines in the United States – 2006–2012.  
623 *Expert Review of Vaccines* **2014**, 13 (3), 365–376.  
624 <https://doi.org/10.1586/14760584.2014.877846>.
- 625 (46) Anderson, E. J. Rotavirus Vaccines: Viral Shedding and Risk of Transmission. *The Lancet*  
626 *Infectious Diseases* **2008**, 8 (10), 642–649. [https://doi.org/10.1016/S1473-3099\(08\)70231-](https://doi.org/10.1016/S1473-3099(08)70231-7)  
627 [7.](https://doi.org/10.1016/S1473-3099(08)70231-7)
- 628 (47) Eftim, S. E.; Hong, T.; Soller, J.; Boehm, A.; Warren, I.; Ichida, A.; Nappier, S. P.  
629 Occurrence of Norovirus in Raw Sewage – A Systematic Literature Review and Meta-  
630 Analysis. *Water Research* **2017**, 111 (Supplement C), 366–374.  
631 <https://doi.org/10.1016/j.watres.2017.01.017>.
- 632 (48) Betancourt, W. Q.; Shulman, L. M. Polioviruses and Other Enteroviruses. In *Water and*  
633 *Sanitation for the 21st Century: Health and Microbiological Aspects of Excreta and*  
634 *Wastewater Management (Global Water Pathogen Project; Rose, J. B., Jimenez-Cisneros,*  
635 *B., Eds.; Meschke, J. S., Girones, R., Series Eds.; Part 3: Specific Excreted Pathogens:*  
636 *Environmental and Epidemiology Aspects - Section 1: Viruses; Michigan State University,*  
637 *East Lansing, MI, 2017.*
- 638 (49) Brinkman, N. E.; Shay, F. G.; Keely, S. P. Retrospective Surveillance of Wastewater To  
639 Examine Seasonal Dynamics of Enterovirus Infections. *mSphere* **2017**, 2 (3), e00099-17.  
640 <https://doi.org/10.1128/mSphere.00099-17>.
- 641 (50) Monpoeho, S.; Dehée, A.; Mignotte, B.; Schwartzbrod, L.; Marechal, V.; Nicolas, J.-C.;  
642 Billaudel, S.; Ferré, V. Quantification of Enterovirus RNA in Sludge Samples Using Single  
643 Tube Real-Time RT-PCR. *BioTechniques* **2000**, 29 (1), 88–93.  
644 <https://doi.org/10.2144/00291st03>.
- 645 (51) Gerba, C. P.; Goyal, S. M.; Hurst, C. J.; Labelle, R. L. Type and Strain Dependence of  
646 Enterovirus Adsorption to Activated Sludge, Soils and Estuarine Sediments. *Water*

- 647 *Research* **1980**, *14* (9), 1197–1198. [https://doi.org/10.1016/0043-1354\(80\)90176-1](https://doi.org/10.1016/0043-1354(80)90176-1).
- 648 (52) Fong, T.-T.; Phanikumar, M. S.; Xagorarakis, I.; Rose, J. B. Quantitative Detection of  
649 Human Adenoviruses in Wastewater and Combined Sewer Overflows Influencing a  
650 Michigan River. *Applied and Environmental Microbiology* **2010**, *76* (3), 715–723.  
651 <https://doi.org/10.1128/AEM.01316-09>.
- 652 (53) Katayama, H.; Haramoto, E.; Oguma, K.; Yamashita, H.; Tajima, A.; Nakajima, H.; Ohgaki,  
653 S. One-Year Monthly Quantitative Survey of Noroviruses, Enteroviruses, and  
654 Adenoviruses in Wastewater Collected from Six Plants in Japan. *Water Research* **2008**, *42*  
655 (6), 1441–1448. <https://doi.org/10.1016/j.watres.2007.10.029>.
- 656 (54) Jiang, S. C. Human Adenoviruses in Water: Occurrence and Health Implications: A  
657 Critical Review. *Environ. Sci. Technol.* **2006**, *40* (23), 7132–7140.  
658 <https://doi.org/10.1021/es060892o>.
- 659 (55) Martin, N. A.; Gonzalez, G.; Reynolds, L. J.; Bennett, C.; Campbell, C.; Nolan, T. M.;  
660 Byrne, A.; Fennema, S.; Holohan, N.; Kuntamukkula, S. R.; Sarwar, N.; Sala-Comorera, L.;  
661 Dean, J.; Urtasun-Elizari, J. M.; Hare, D.; Liddy, E.; Joyce, E.; O’Sullivan, J. J.; Cuddihy, J.  
662 M.; McIntyre, A. M.; Robinson, E. P.; Dahly, D.; Fletcher, N. F.; Cotter, S.; Fitzpatrick, E.;  
663 Carr, M. J.; De Gascun, C. F.; Meijer, W. G. Adeno-Associated Virus 2 and Human  
664 Adenovirus F41 in Wastewater during Outbreak of Severe Acute Hepatitis in Children,  
665 Ireland. *Emerg Infect Dis* **2023**, *29* (4), 751–760. <https://doi.org/10.3201/eid2904.221878>.
- 666 (56) Reyne, M. I.; Allen, D. M.; Levickas, A.; Allingham, P.; Lock, J.; Fitzgerald, A.; McSparron,  
667 C.; Nejad, B. F.; McKinley, J.; Lee, A.; Bell, S. H.; Quick, J.; Houldcroft, C. J.; Bamford, C.  
668 G. G.; Gilpin, D. F.; McGrath, J. W. Detection of Human Adenovirus F41 in Wastewater  
669 and Its Relationship to Clinical Cases of Acute Hepatitis of Unknown Aetiology. *Science of*  
670 *The Total Environment* **2023**, *857*, 159579.  
671 <https://doi.org/10.1016/j.scitotenv.2022.159579>.
- 672 (57) Brooks, G.; Butel, J.; Morse, S. *Medical Microbiology*, 22nd ed.; McGraw-Hill: San  
673 Francisco, CA, 2001.
- 674 (58) Takuissu, G. R.; Kenmoe, S.; Ebogo-Belobo, J. T.; Kengne-Ndé, C.; Mbagha, D. S.; Bowo-  
675 Ngandji, A.; Ndzie Ondigui, J. L.; Kenfack-Momo, R.; Tchatchouang, S.; Kenfack-Zanguim,  
676 J.; Lontuo Fogang, R.; Zeuko’o Menkem, E.; Kame-Ngasse, G. I.; Magoudjou-Pekam, J.  
677 N.; Veneri, C.; Mancini, P.; Bonanno Ferraro, G.; Iaconelli, M.; Orlandi, L.; Del Giudice, C.;  
678 Suffredini, E.; La Rosa, G. Occurrence of Hepatitis A Virus in Water Matrices: A  
679 Systematic Review and Meta-Analysis. *Int J Environ Res Public Health* **2023**, *20* (2).  
680 <https://doi.org/10.3390/ijerph20021054>.
- 681 (59) Hellmér, M.; Paxéus, N.; Magnius, L.; Enache, L.; Arnholm, B.; Johansson, A.; Bergström,  
682 T.; Norder, H. Detection of Pathogenic Viruses in Sewage Provided Early Warnings of  
683 Hepatitis A Virus and Norovirus Outbreaks. *Applied and Environmental Microbiology* **2014**,  
684 *80* (21), 6771–6781. <https://doi.org/10.1128/AEM.01981-14>.
- 685 (60) Arraj, A.; Bohatier, J.; Laveran, H.; Traore, O. Comparison of Bacteriophage and Enteric  
686 Virus Removal in Pilot Scale Activated Sludge Plants. *Journal of Applied Microbiology*  
687 **2005**, *98* (2), 516–524. <https://doi.org/10.1111/j.1365-2672.2004.02485.x>.
- 688 (61) Tisza, M.; Cregeen, S. J.; Avadhanula, V.; Zhang, P.; Ayvaz, T.; Feliz, K.; Hoffman, K. L.;  
689 Clark, J. R.; Terwilliger, A.; Ross, M. C.; Cormier, J.; Henke, D.; Troisi, C.; Wu, F.; Rios, J.;  
690 Deegan, J.; Hansen, B.; Balliew, J.; Gitter, A.; Zhang, K.; Li, R.; Bauer, C. X.; Mena, K. D.;  
691 Piedra, P. A.; Petrosino, J. F.; Boerwinkle, E.; Maresso, A. W. Comprehensive Wastewater  
692 Sequencing Reveals Community and Variant Dynamics of the Collective Human Virome.  
693 *medRxiv* **2023**. <https://doi.org/10.1101/2023.05.03.23289441>.
- 694 (62) Erster, O.; Bar-Or, I.; Levy, V.; Shatzman-Steuerman, R.; Sofer, D.; Weiss, L.; Vasserman,  
695 R.; Fratty, I. S.; Kestin, K.; Elul, M.; Levi, N.; Alkrenawi, R.; Mendelson, E.; Mandelboim,  
696 M.; Weil, M. Monitoring of Enterovirus D68 Outbreak in Israel by a Parallel Clinical and  
697 Wastewater Based Surveillance. *Viruses* **2022**, *14* (5). <https://doi.org/10.3390/v14051010>.



- 698 (63) Tedcastle, A.; Wilton, T.; Pegg, E.; Klapsa, D.; Bujaki, E.; Mate, R.; Fritzsche, M.;  
699 Majumdar, M.; Martin, J. Detection of Enterovirus D68 in Wastewater Samples from the UK  
700 between July and November 2021. *Viruses* **2022**, *14* (1).  
701 <https://doi.org/10.3390/v14010143>.
- 702 (64) Vila, T.; Sultan, A. S.; Montelongo-Jauregui, D.; Jabra-Rizk, M. A. Candida Auris: A  
703 Fungus with Identity Crisis. *Pathogens and Disease* **2020**, *78* (4), ftaa034.  
704 <https://doi.org/10.1093/femspd/ftaa034>.
- 705 (65) Osei Sekyere, J. Candida Auris: A Systematic Review and Meta-Analysis of Current  
706 Updates on an Emerging Multidrug-Resistant Pathogen. *Microbiologyopen* **2018**, *7* (4),  
707 e00578. <https://doi.org/10.1002/mbo3.578>.
- 708 (66) Lee, W. L.; Gu, X.; Armas, F.; Leifels, M.; Wu, F.; Chandra, F.; Chua, F. J. D.; Syenina, A.;  
709 Chen, H.; Cheng, D.; Ooi, E. E.; Wuertz, S.; Alm, E. J.; Thompson, J. Monitoring Human  
710 Arboviral Diseases through Wastewater Surveillance: Challenges, Progress and Future  
711 Opportunities. *Water Research* **2022**, *223*, 118904.  
712 <https://doi.org/10.1016/j.watres.2022.118904>.  
713  
714  
715  
716

717

| Virus                                    | Genomic target                                | Non-target testing (negatives)            | Target testing (positives)                         | Reference                        |
|------------------------------------------|-----------------------------------------------|-------------------------------------------|----------------------------------------------------|----------------------------------|
| Adenovirus F (HAdV)                      | Hexon gene                                    | NATRVP2.1-BIO                             | ATCC VR-930DQ                                      | Not applicable                   |
| Enterovirus D68 (EVD68)                  | Genome Polyprotein (VP1)                      | NATRVP2.1-BIO<br>NATEVP-C                 | ATCC VR-1826DQ and<br>ATCC VR-1823D<br>Gene Blocks | Wylie et al. <sup>21</sup>       |
| Norovirus GII (HuNoV GII)                | ORF1-2 junction                               | NATRVP2.1-BIO                             | ATCC VR-3235SD                                     | Loisy et al. <sup>25</sup>       |
| Norovirus GI (HuNoV GI)                  | ORF1-2 junction                               | NATRVP2.1-BIO<br>NATEVP-C                 | ATCC VR-3234SD                                     | Jothikuman et al. <sup>24</sup>  |
| Rotavirus                                | Non-structural Region Protein 3 (NSP3)        | NATRVP2.1-BIO<br>NATEVP-C                 | ATCC VR-2018DQ                                     | Jothikumar et al. <sup>22</sup>  |
| Enterovirus (EV)                         | 5' UTR                                        | NATRVP2.1-BIO                             | NATEVP-C                                           | Gregory et al. <sup>26</sup>     |
| Hepatitis A (HAV)                        | 5'UTR                                         | NATRVP2.1-BIO<br>NATEVP-C                 | ATCC VR-3257SD                                     | Jothikumar et al. <sup>23</sup>  |
| West Nile Virus (WNV)                    | Polyprotein gene                              | NATRVP2.1-BIO                             | VR-3274SD                                          | Lanciotti et al. <sup>27</sup>   |
| <i>Candida auris</i> ( <i>C. auris</i> ) | 5.8S, all of ITS2, and a fragment of 28S rDNA | NATRVP2.1-BIO<br>NATEVP-C<br>NATCTVPOS-BD | ATCC MYA-5001                                      | Kordalewska et al. <sup>20</sup> |

718 Table 1. Viruses/fungus considered in this study and the region of the genome that each assay  
719 targeted. Viruses/fungi used to test specificity are indicated as “non target testing” and  
720 viruses/fungi used positive controls are indicated as “target testing”. The reference for each  
721 assay is provided aside from HAdV for which an assay was developed herein. As described in  
722 the text, we also developed novel primers and adjusted the probe for the EVD-68 assay to  
723 capture the variant circulating in the winter of 2022. All non-target controls are panels sold by  
724 Zeptomatrix (panels begin with NAT prefix, “Zepto”, Buffalo, NY). ATCC is American Type  
725 Culture Collection. The NATRVP2.1-BIO panel includes chemically inactivated intact influenza  
726 viruses, parainfluenza viruses, adenovirus, rhinovirus, metapneumovirus, and coronaviruses.  
727 The NATEVP-C panel includes chemically inactivated intact coxsackieviruses, echovirus, and  
728 parechovirus. The NATCTVPOS-BD includes chemically inactivated *Candida albicans*, *C.*  
729 *krusei*, *C. glabrata*, and *Trichomoniasis vaginalis*. The full list of species in the panels is  
730 available from the vendor.

| Target    | Primer/Probe | Sequence                                         |
|-----------|--------------|--------------------------------------------------|
| HAdV      | Forward      | CCTCCTGTGTTACGCCAGA                              |
|           | Reverse      | CAGGCTGAAGTASGTATCGG                             |
|           | Probe        | CTCGATGATGCCGCAATGGT                             |
| HuNoV GII | Forward      | ATGTTCAgRTGGATGAGRTTCTCWGA                       |
|           | Reverse      | TCGACGCCATCTTCATTCAACA                           |
|           | Probe        | AGCACGTGGGAGGGCGATCG                             |
| EVD68     | Forward      | CACYGAACCAGARGAAGCCA<br>CACTGAACCAGAGGAAGCTA     |
|           | Reverse      | CCAAAGCTGCTCTACTGAGAAA<br>CTAAAGCTGCCCTACTAAGRAA |
|           | Probe        | TCGCACAGTGATAAATCRACAYGG                         |
| WNV       | Forward      | TCAGCGATCTCTCCACCAAAG                            |
|           | Reverse      | GGGTCAGCACGTTTGTcATTG                            |
|           | Probe        | TGCCCCGACCATGGGAGAAGCT                           |
| HuNoV GI  | Forward      | GCCATGTTCCGITGG ATG                              |
|           | Reverse      | TCCTTAGACGCCATCATCAT                             |
|           | Probe        | TG GGACAGGAGATCGCAATCTC                          |
| Rotavirus | Forward      | CAGTGGTTGATGCTCAAGATGGA                          |
|           | Reverse      | TCATTGTAATCATATTGAATACCCA                        |
|           | Probe        | ACAActGCAGCTTCAAAGAAGWGT                         |
| EV        | Forward      | CCCTGAATGCGGCTAAT                                |

|          |         |                               |
|----------|---------|-------------------------------|
|          | Reverse | TGTCACCATAAGCAGCCA            |
|          | Probe   | ACGGACACCCAAAGTAGTCGGTTC      |
| C. auris | Forward | CGCACATTGCGCCTTGGGGTA         |
|          | Reverse | GTAGTCCTACCTGATTTGAGGCGAC     |
|          | Probe   | CTTCTACCAATCTTCGCGGT          |
| HAV      | Forward | GGTAGGCTACGGGTGAAAC           |
|          | Reverse | AACAACCTACCAATATCCGC          |
|          | Probe   | CTTAGGCTAATACTTCTATGAAGAGATGC |

731  
732 Table 2. Primers and probes used in this study. Primers and probes were purchased from  
733 Integrated DNA Technologies (Coralville, IA, USA). All probes contained fluorescent molecules  
734 and quenchers (5' HEX, FAM, Cy5, Cy5.5, ROX, and/or ATTO950/ZEN/3' IBFQ); FAM, 6-  
735 fluorescein amidite; HEX, hexachloro-fluorescein; Cy5, Cyanine-5; Cy5.5, Cyanine5.5; ROX,  
736 carboxyrhodamine; ZEN, a proprietary internal quencher from Integrated DNA Technologies  
737 (Coralville, IA, USA); and IBFQ, Iowa Black FQ.

738

| WWTP |        | Rota                | HAdV                | EV                  | HuNoV GI            | HuNoV GII           | HAV                 | EVD68               | C. auris            |
|------|--------|---------------------|---------------------|---------------------|---------------------|---------------------|---------------------|---------------------|---------------------|
| OSP  | median | 1.0x10 <sup>3</sup> | 5.8x10 <sup>5</sup> | 4.1x10 <sup>4</sup> | 2.8x10 <sup>4</sup> | 5.7x10 <sup>5</sup> | 0                   | 0                   | 0                   |
|      | 25th   | 0                   | 4.9x10 <sup>4</sup> | 2.6x10 <sup>4</sup> | 1.2x10 <sup>4</sup> | 3.5x10 <sup>5</sup> | 0                   | 0                   | 0                   |
|      | 75th   | 3.2x10 <sup>3</sup> | 1.5x10 <sup>6</sup> | 6.9x10 <sup>4</sup> | 4.7x10 <sup>4</sup> | 1.1x10 <sup>6</sup> | 0                   | 0                   | 0                   |
|      | max    | 7.8x10 <sup>4</sup> | 5.8x10 <sup>6</sup> | 2.4x10 <sup>5</sup> | 2.6x10 <sup>5</sup> | 6.4x10 <sup>6</sup> | 9x10 <sup>4</sup>   | 7.2x10 <sup>4</sup> | 4.0x10 <sup>3</sup> |
|      | # ND   | 89                  | 9                   | 0                   | 0                   | 0                   | 220                 | 182                 | 202                 |
|      | #      | 230                 | 230                 | 230                 | 230                 | 230                 | 230                 | 230                 | 230                 |
| SJ   | median | 3.3x10 <sup>3</sup> | 1.9x10 <sup>6</sup> | 5.4x10 <sup>4</sup> | 3.4x10 <sup>4</sup> | 7.0x10 <sup>5</sup> | 6.6x10 <sup>2</sup> | 0                   | 0                   |
|      | 25th   | 1.5x10 <sup>3</sup> | 5.3x10 <sup>5</sup> | 3.7x10 <sup>4</sup> | 1.6x10 <sup>4</sup> | 3.5x10 <sup>5</sup> | 0                   | 0                   | 0                   |
|      | 75th   | 8.5x10 <sup>3</sup> | 4.3x10 <sup>6</sup> | 7.5x10 <sup>4</sup> | 7.6x10 <sup>4</sup> | 1.5x10 <sup>6</sup> | 3.1x10 <sup>3</sup> | 0                   | 0                   |
|      | max    | 2.7x10 <sup>5</sup> | 8.5x10 <sup>7</sup> | 1.2x10 <sup>6</sup> | 1.4x10 <sup>6</sup> | 1.1x10 <sup>8</sup> | 4.0x10 <sup>5</sup> | 2.8x10 <sup>5</sup> | 0                   |
|      | # ND   | 24                  | 0                   | 1                   | 0                   | 0                   | 111                 | 177                 | 229                 |
|      | #      | 229                 | 229                 | 229                 | 229                 | 229                 | 229                 | 229                 | 229                 |

739 Table 3. Summary statistics for infectious disease targets in OSP and SJ wastewater solids.  
 740 Units of concentration are copies per gram dry weight. 25th is 25th percentile, 75th is 75th  
 741 percentile, max is the maximum value, # ND is number of non-detect, # is the total number of  
 742 samples.

743

744

745  
746  
747

748 **Figures**

749

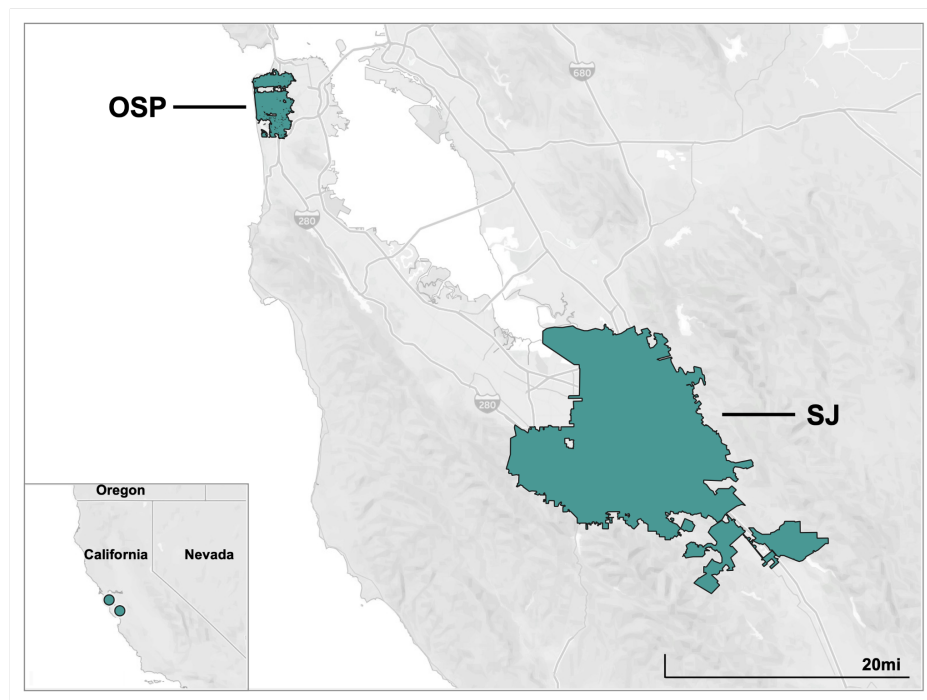

750

751 Figure 1 Sewersheds served by the two WWTPs in this study.

752

753 Figure 2. Multiplex assay performance. The concentrations of the different targets in units of copies per reaction input and measured  
754 in each experiment is provided. The white symbols are for reactions without the 7 background nucleic-acid targets and black symbols  
755 include high concentrations of the 7 other nucleic-acid targets. Error bars are standard deviations, if error bars cannot be seen, then  
756 they are smaller than the symbol. The line represents the 1:1 line. "Meas" is measles, "Rota" is rotavirus. Abbreviations for the  
757 different targets are provided in the main text.

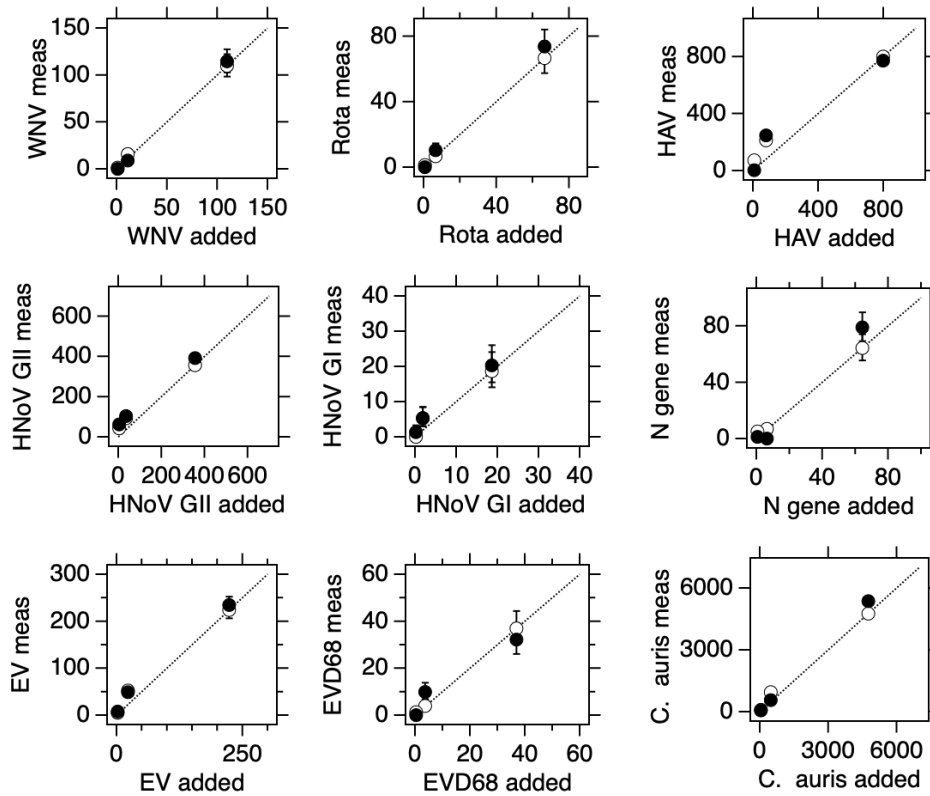

758

759

760 **Figure 3.** Concentrations of HuNoV G1 and GII, rotavirus, HAeV, EV, HAV, EVD68 and *C. auris* nucleic-acids in wastewater solids at  
761 OSP and SJ. Error bars show standard deviation. The black line shows a 5-adjacent sample trimmed average. A gray symbol at the  
762 top of the plot indicates a value that is higher than the y-axis scale.

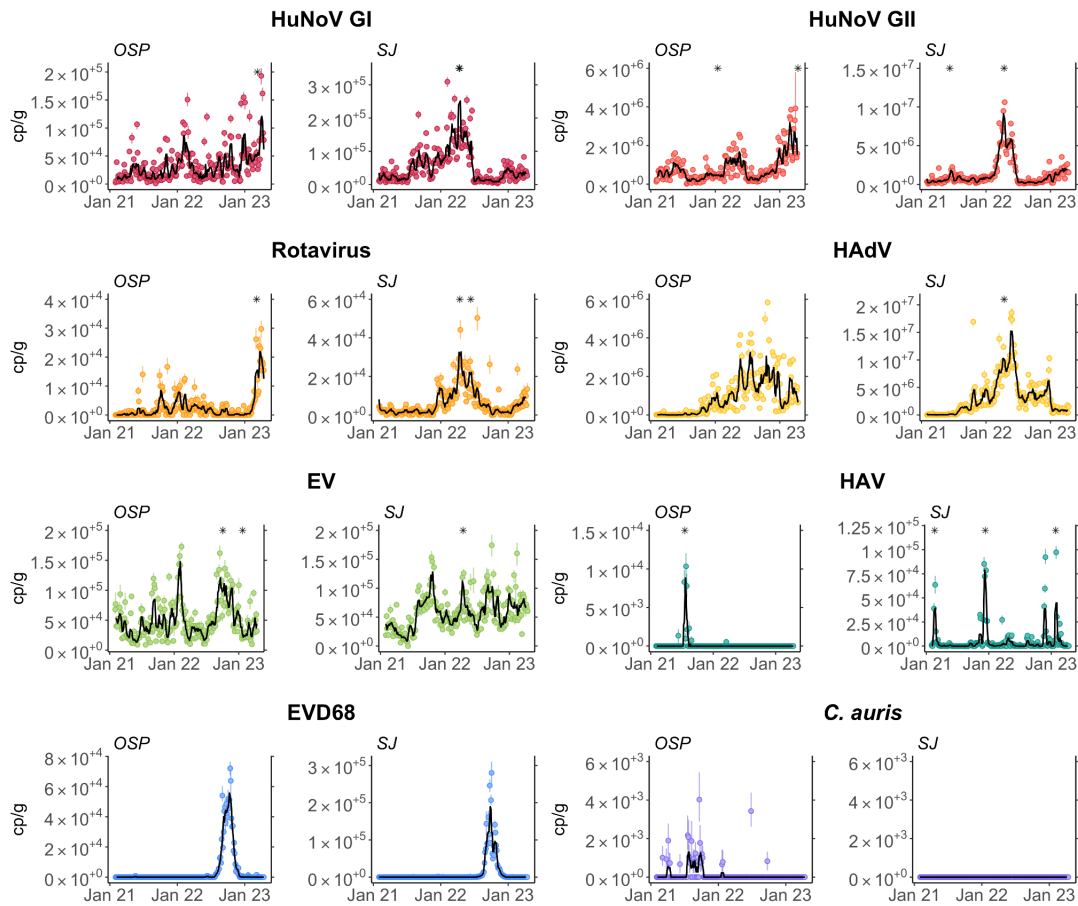

763

764
