# Supplementary material for: Two years of longitudinal measurements of human adenovirus group F, norovirus GI and GII, rotavirus, enterovirus, enterovirus D68, hepatitis A virus, Candida auris, and West Nile virus nucleic-acids in wastewater solids: A retrospective study at two wastewater treatment plants
Source: bioRxiv or medRxiv preprint supplement (doi:10.1101/2023.08.22.23294424), 2023-08-24
Supplement: Supplementary file [file media-1.pdf]

1 Supporting information

2 Two years of longitudinal measurements of human adenovirus group F, norovirus GI and GII,  
3 rotavirus, enterovirus, enterovirus D68, hepatitis A virus, *Candida auris*, and West Nile Virus  
4 nucleic-acids in wastewater solids: A retrospective study at two wastewater treatment plants  
5  
6

7 Alexandria B. Boehm<sup>1\*</sup>, Marlene K. Wolfe<sup>2</sup>, Bradley J. White<sup>3</sup>, Bridgette Hughes<sup>3</sup>, Dorothea  
8 Doung<sup>3</sup>

- 9 1. Department of Civil & Environmental Engineering, School of Engineering and Doerr  
10 School of Sustainability, Stanford University, 473 Via Ortega, Stanford, CA, USA 94305
- 11 2. Gangarosa Department of Environmental Health, Rollins School of Public Health, Emory  
12 University, 1518 Clifton Rd, Atlanta, GA, USA, 30322
- 13 3. Verily Life Sciences LLC, South San Francisco, CA, USA, 94080  
14  
15  
16  
17

18 \* Author to whom correspondence should be addressed. Email: [aboehm@stanford.edu](mailto:aboehm@stanford.edu), Tel:  
19 650-724-9128  
20

21 **Additional details related to the EMMI guidelines.** Thirty-six samples were selected at  
22 random for this analysis; this represents 8% of the samples processed in the study. As  
23 described in the methods section, each sample was run as template in three different PCR  
24 reactions; 1 for PMMoV, 1 for rotavirus, SARS-CoV-2, WNV, HuNoV GII, and HAdV, and 1 for  
25 EVD68, HAV, EV, HuNoV GI, and C. auris. The average (standard deviation) number of  
26 partitions (droplets) for each of the three reactions (across the 10 replicates) was 164164  
27 (38851) for the reaction for PMMoV, 174321 (20126) for the reaction for rotavirus, SARS-CoV-2,  
28 WNV, HuNoV GII, and HAdV, and 185497 (24410) for the reaction for EVD68, HAV, EV, HuNoV  
29 GI, and C. auris. The volume of the partitions, as reported by the machine vendor is 0.00085  $\mu\text{L}$ .  
30 The mean and standard deviation of copies per partition for each target is shown in Table S2.

31

32

33  
34

35 Table S1. Parameters used in the development of new primers and probes using Primer3Plus  
36 (<https://primer3plus.com/>, accessed 7/16/23).

- 37
- 38 • Product size ranges: 60-275
  - 39 • Primer size: min 15, opt 20, max 36
  - 40 • Primer melting temperature: min 50°C, optimal 60°C, max 65°C - GC% content: min  
41 40%, optimal 50%, high 60%
  - 42 • concentration of divalent cations = 3.8 mM
  - 43 • concentration of dNTPs needs to be 0.8 mM
  - 44 • Internal Oligo: size min 15, optimal 20, max 30
  - 45 • Internal Oligo: Melting temp min 62°C, optimal 63°C, max 70°C
  - 46 • Internal Oligo: GC% min 30%, optimal 50%, max 80%

46  
47  
48

49 Table S2. For each target measured in this study, the mean and standard deviation (sd) of the  
50 total number of copies of target per partition. Num is the number of samples out of a random 36  
51 included in this analysis that had detectable target in them and thus contributed to the  
52 calculated mean and standard deviation. A value of 0 indicates that of the random 36 samples  
53 selected, none of them had the target present in them. Abbreviations for the targets are  
54 provided in the main text except “Rota” is rotavirus and SC2 is the N gene of SARS-CoV-2.

| Target | EVD68                 | HAV                   | EV                    | HuNoV<br>GI           | C.<br>auris | Rota                  | SC2                   | WNV | HuNoV GII             | HAdV                  | PMMoV |
|--------|-----------------------|-----------------------|-----------------------|-----------------------|-------------|-----------------------|-----------------------|-----|-----------------------|-----------------------|-------|
| mean   | $1.04 \times 10^{-3}$ | $9.91 \times 10^{-5}$ | $1.02 \times 10^{-3}$ | $8.93 \times 10^{-4}$ | 0           | $1.20 \times 10^{-4}$ | $1.37 \times 10^{-3}$ | 0   | $1.12 \times 10^{-2}$ | $5.03 \times 10^{-2}$ | 0.15  |
| sd     | $1.18 \times 10^{-3}$ | $1.59 \times 10^{-4}$ | $3.65 \times 10^{-4}$ | $7.94 \times 10^{-4}$ | 0           | $1.14 \times 10^{-4}$ | $1.22 \times 10^{-3}$ | 0   | $8.57 \times 10^{-3}$ | $3.58 \times 10^{-2}$ | 0.069 |
| num    | 19                    | 15                    | 36                    | 36                    | 0           | 23                    | 36                    | 0   | 36                    | 36                    | 36    |

55  
56

57 Figure S1. EMMI checklist.  
58

## Environmental Microbiology Minimum Information Checklist

**Study Description**

Study: retrospective\_2  
Date: July 2023  
Completed by: Alexandria Boehm

| Environmental Sampling       | Sample Treatment                                                                                        | Sample Reduction                                                                                      | Nucleic Acid Extraction        | Reverse Transcription                                            | PCR Detection                                                                                  | Analysis            |
|------------------------------|---------------------------------------------------------------------------------------------------------|-------------------------------------------------------------------------------------------------------|--------------------------------|------------------------------------------------------------------|------------------------------------------------------------------------------------------------|---------------------|
| Described in methods section | <input checked="" type="checkbox"/> Performed<br><input type="checkbox"/> No sample treatment performed | <input checked="" type="checkbox"/> Performed<br>Centrifugation was used, as described in the methods | Methods provided in the paper. | <input checked="" type="checkbox"/> Performed<br>One Step RT-PCR | <input type="checkbox"/> qPCR <input checked="" type="checkbox"/> dPCR<br>All methods provided | Provided in methods |

**Control Checklist**

|                                        | Environmental Sampling              | Sample Treatment         | Sample Reduction                    | Nucleic Acid Extraction             | Reverse Transcription               | PCR Detection                       |                          |
|----------------------------------------|-------------------------------------|--------------------------|-------------------------------------|-------------------------------------|-------------------------------------|-------------------------------------|--------------------------|
| Step performed                         | <input checked="" type="checkbox"/> | <input type="checkbox"/> | <input checked="" type="checkbox"/> | <input type="checkbox"/>            | <input checked="" type="checkbox"/> | <input checked="" type="checkbox"/> |                          |
| Step has control info                  | <input type="checkbox"/>            | <input type="checkbox"/> | <input type="checkbox"/>            | <input checked="" type="checkbox"/> | <input checked="" type="checkbox"/> | <input checked="" type="checkbox"/> | <b>Negative Controls</b> |
| # control replicates                   | 0                                   | 0                        | 0                                   | 2                                   | 2                                   | 2                                   |                          |
| Control result reported                | <input type="checkbox"/>            | <input type="checkbox"/> | <input type="checkbox"/>            | <input checked="" type="checkbox"/> | <input checked="" type="checkbox"/> | <input checked="" type="checkbox"/> |                          |
| Data handling reported                 | <input checked="" type="checkbox"/> | <input type="checkbox"/> | <input checked="" type="checkbox"/> | <input checked="" type="checkbox"/> | <input checked="" type="checkbox"/> | <input checked="" type="checkbox"/> |                          |
| Control introduced                     | <input type="checkbox"/>            | <input type="checkbox"/> | <input checked="" type="checkbox"/> | <input type="checkbox"/>            | <input type="checkbox"/>            | <input type="checkbox"/>            | <b>Positive Controls</b> |
| Internal/External Independent/Parallel | N/A                                 | N/A                      | External<br>Parallel                | External<br>Parallel                | External<br>Parallel                | External<br>Parallel                |                          |
| Step has control info                  | <input type="checkbox"/>            | <input type="checkbox"/> | <input checked="" type="checkbox"/> | <input checked="" type="checkbox"/> | <input checked="" type="checkbox"/> | <input checked="" type="checkbox"/> |                          |
| # control replicates                   | 0                                   | 0                        | 10                                  | 10                                  | 10                                  | 10                                  |                          |
| Control result reported                | <input type="checkbox"/>            | <input type="checkbox"/> | <input checked="" type="checkbox"/> | <input checked="" type="checkbox"/> | <input checked="" type="checkbox"/> | <input checked="" type="checkbox"/> |                          |
| Data Handling reported                 | <input type="checkbox"/>            | <input type="checkbox"/> | <input checked="" type="checkbox"/> | <input checked="" type="checkbox"/> | <input checked="" type="checkbox"/> | <input checked="" type="checkbox"/> |                          |

**Process Checklist**

**Environmental Sampling**

- Sampling Procedure
- Number of samples
- Sample amount, mean, range
- Sampling locations, dates, times

**Sample Reduction**

- Performed
- Reduction procedure
- Reagents
- Concentration Factor

**Sample Treatment**

- Performed
- Treatment procedure
- Reagents

**Nucleic Acid Extraction**

- Extraction procedure
- Amount extracted, amount obtained
- Extract storage conditions

**qPCR or dPCR**

- Target gene name, amplicon length
- Thermocycling temperatures and times
- Master mix: composition, vendors, concentrations
- Additives: vendors, concentrations
- Template amount added, pre-treatment (if any)
- Primers: sequences, concentrations, vendors, references
- Amplicon confirmation method (probe, melt curve, etc)
- Probe sequence, concentration, vendor, reference
- Instrumentation
- Equivalent volume of sample analyzed by PCR
- Inhibition assessment procedure
- Inhibition control description (if used)
- Number samples tested and found inhibited

**Reverse Transcription**

- Performed
- One or two step
- cDNA storage conditions (if two step)
- Reaction temperatures and times
- Reaction reagents and concentrations
- Priming method
- Reaction volume, added template amount
- Inhibition assessment procedure
- Inhibition control description (if used)
- Number samples tested and found inhibited

**Analysis – dPCR**

- Threshold settings
- Technical replicates, number, well merging
- Partitions measured, number, mean, variance
- Partition volume
- Target copies per partition, mean, variance
- Program used for dPCR analysis
- Explanation of control results, example plots

**Analysis – qPCR**

- Method for handling failed negative controls
- Technical replicates, number, calculations
- Calibration standards: description and source
- Method of quantifying standards
- Calibration curve slope
- Calibration curve R2
- Lowest standard measured or 95% LOD
- Cq value determination method

59

4

60

61 Figure S2. Concentrations of HuNoV G1 and GII, rotavirus, HAdV, EV, HAV, EVD68 and *C. auris*  
62 in wastewater solids at OSP and SJ normalized by concentrations of PMMoV. Error bars show  
63 standard deviation of the ratio propagated by assuming the errors are symmetric and described  
64 by the larger of the lower or error bar from the original measurements. The black line shows a 5-  
65 adjacent sample trimmed average. A gray symbol at the top of the plot indicates a value that is  
66 higher than the y-axis scale.

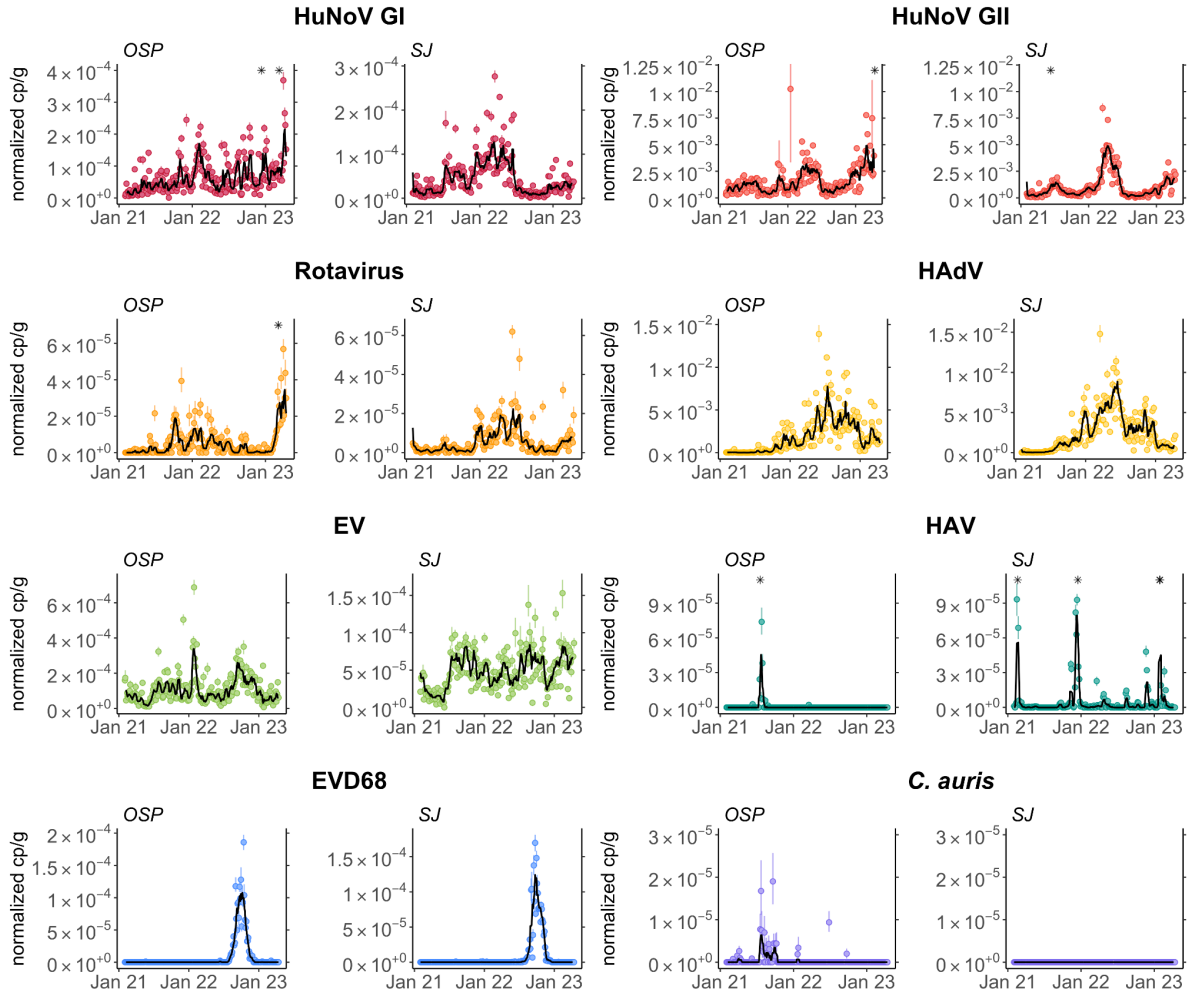

67
